# Supplementary material for: Syntheses, crystal structures and properties of novel copper(ii) complexes obtained by reactions of copper(ii) sulfate pentahydrate with tripodal ligands
Source: Royal Society of Chemistry journal article supplement (doi:10.1039/b419418g), 2005-01-01
Supplement: b419418g.pdf [file b419418g.pdf]

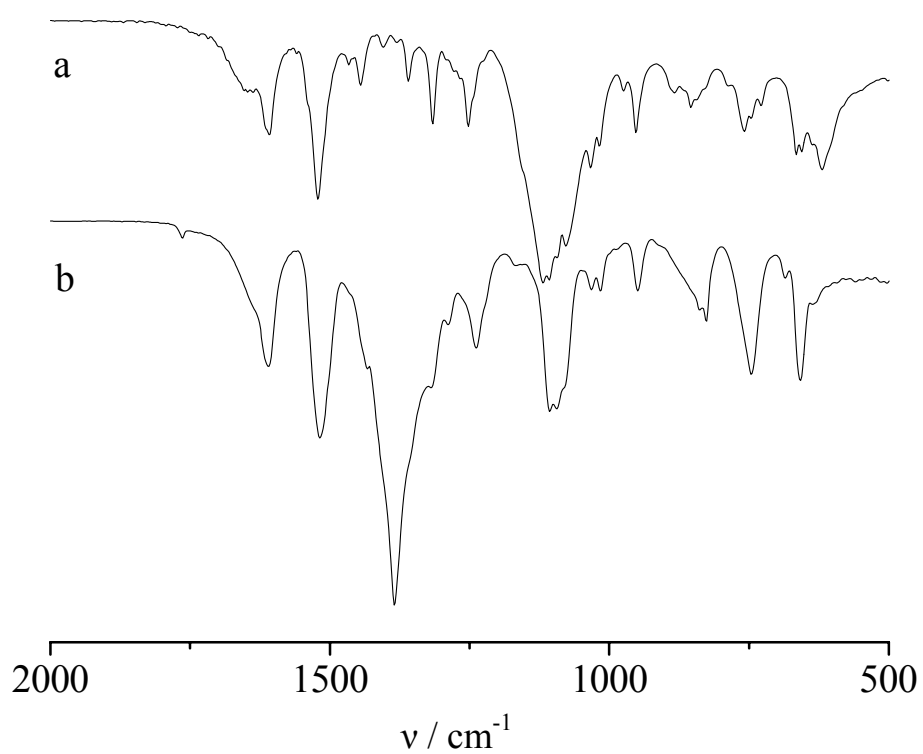

Figure S1 FT-IR spectra of (a) complex **6**, (b) complex **6** treated with an aqueous solution of NaNO<sub>3</sub> (i.e. anion exchange product).

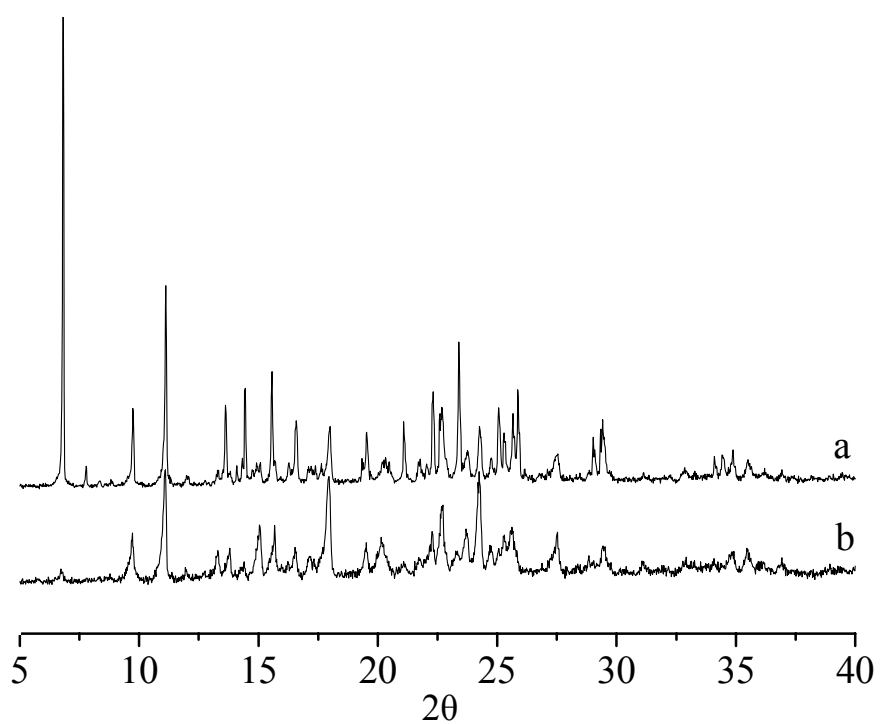

Figure S2 X-Ray powder diffraction diagram of (a) **6** as prepared, (b) solids obtained after

anion exchange.
